# Supplementary material for: The making of a photosynthetic animal
Source: Oxford University Press journal article supplement (doi:10.1242/jeb.046540), 2010-12-22
Supplement: jeb046540tables1.pdf [file jeb046540tables1.pdf]

Table S1: Representative examples of metazoans with their corresponding symbionts along with referenced evidence of photosynthetic (PS) activity of the symbiont *in situ*. Examples were compiled from the sources listed along with reviews by Trench, 1993, Lee et al., 2001, Carpenter and Foster, 2002, Venn et al., 2008 and Usher, 2008. Underlined animals are represented in Figure 1.

| SYMBIONT                                                                    |                                    | HOST     |          |                                           | Evidence of PS Activity | Reference                  |
|-----------------------------------------------------------------------------|------------------------------------|----------|----------|-------------------------------------------|-------------------------|----------------------------|
| Phylum/Class                                                                | Genus species/Clade                | Phyla    | Organism | Genus Species                             |                         |                            |
| <b>Cyanobacteria</b>                                                        |                                    |          |          |                                           |                         |                            |
| <i>6 genera of cyanobacteria have been found in over 100 sponge species</i> |                                    |          |          |                                           |                         |                            |
|                                                                             | <i>Synechococcus spongiarum</i>    | Porifera | Sponge   | Multiple                                  | <sup>14</sup> C/P:R     | Wilkinson, 1979,1980,1983* |
|                                                                             |                                    |          |          | <i>Aplysina aerophoba</i>                 |                         |                            |
|                                                                             |                                    |          |          | <i>A. archeri</i>                         |                         |                            |
|                                                                             |                                    |          |          | <i>A. fulva</i>                           | P:R/growth rates        | Erwin and Thacker, 2008    |
|                                                                             |                                    |          |          | <u><i>Neopetrosia subtriangularis</i></u> | P:R/growth rates        | Erwin and Thacker, 2008    |
|                                                                             |                                    |          |          | <i>Theonella swinhoei</i>                 |                         |                            |
|                                                                             |                                    |          |          | <i>Xestospongia muta</i>                  |                         |                            |
|                                                                             | <i>Aphanocapsa feldmanni</i>       |          |          | <i>Ircinia variabilis</i>                 | <sup>14</sup> C         | Hentschel et al., 2002     |
|                                                                             |                                    |          |          | <i>Petrosia ficiformis</i>                |                         |                            |
|                                                                             | <i>A. raspaigellae</i>             |          |          | <i>I. variabilis</i>                      |                         |                            |
|                                                                             |                                    |          |          | <i>Terpios hoshinota</i>                  |                         |                            |
|                                                                             | <i>Prochloron</i>                  |          |          | <i>Dictyonella funicularis</i>            |                         |                            |
|                                                                             |                                    |          |          | <i>D. arenosa</i>                         |                         |                            |
|                                                                             |                                    |          |          | <u><i>Didemnum molle</i></u>              |                         |                            |
|                                                                             |                                    |          |          | <i>Lendenfeldia dendyi</i>                |                         |                            |
|                                                                             |                                    |          |          | <i>T. swinhoei</i>                        |                         |                            |
|                                                                             | <i>Synechocystis spongeliae</i>    |          |          | <i>Ulosa funicularis</i>                  |                         |                            |
|                                                                             | <i>S. trididemni</i>               |          |          | <i>Fasciospongia chondrodes</i>           |                         |                            |
|                                                                             |                                    |          |          | <i>Prianos</i> aff. <i>melanos</i>        |                         |                            |
|                                                                             |                                    |          |          | <i>Spirastrella</i> aff. <i>decumbens</i> |                         |                            |
|                                                                             | <i>Oscillatoria spongeliae</i>     |          |          | Multiple                                  |                         |                            |
|                                                                             | Unclassified <i>Cyanobacterium</i> |          |          | Multiple                                  |                         |                            |

| SYMBIONT                                                   |                                       | HOST         |             |                                         | Evidence of PS Activity     | Reference                         |
|------------------------------------------------------------|---------------------------------------|--------------|-------------|-----------------------------------------|-----------------------------|-----------------------------------|
| Phylum/Class                                               | Genus species/Clade                   | Phyla        | Organism    | Genus Species                           |                             |                                   |
| <b><u>Cyanobacteria</u></b>                                |                                       |              |             |                                         |                             |                                   |
| <i>Predominantly Prochloron sp. are found in ascidians</i> |                                       |              |             |                                         |                             |                                   |
|                                                            | <i>Oscillatoria sp.</i>               | Chordata     | Ascidians   | <i>Pyura cancellata</i>                 |                             |                                   |
|                                                            | <i>Prochloron didemnum</i>            |              |             | <i>Diplosoma virens</i>                 | <sup>14</sup> C             | Akazawa et al., 1978              |
|                                                            | <i>Prochloron sp.</i>                 |              |             | <i>Didemnum molle</i>                   | P:R                         | Koike et al., 1993                |
|                                                            | <i>Prochloron sp.</i>                 |              |             | <i>Lissoclinum patella</i>              | <sup>14</sup> C             | Pardy and Lewin, 1981             |
|                                                            | <i>Synechocystis trididemni</i>       |              |             | <i>Trididemnum solidum (and others)</i> |                             |                                   |
| <i>Uncharacterized cyanobacteria in the Echiurid worms</i> |                                       |              |             |                                         |                             |                                   |
|                                                            | Unknown cyanobacteria                 | Echiura      | Spoon Worms | <i>Bonellia fuliginosa</i>              |                             |                                   |
|                                                            | Unknown cyanobacteria                 |              |             | <i>Ikedosoma gogoshimense</i>           |                             |                                   |
| <b><u>Chlorophyceae</u></b>                                |                                       |              |             |                                         |                             |                                   |
|                                                            | <i>Chlorella sp.</i>                  | Acoelomorpha | Flatworm    | <i>Dalyellia viridis</i>                | <sup>14</sup> C             | Douglas, 1987                     |
|                                                            | <i>Chlorella sp.</i>                  | Acoelomorpha | Flatworm    | <i>Typhloplana viridata</i>             | <sup>14</sup> C             | Douglas, 1987                     |
|                                                            | <i>Chlorella sp.</i>                  | Cnidaria     | Hydra       | <i>Hydra viridis</i>                    | <sup>14</sup> C             | Muscatine and Lenhoff, 1963       |
|                                                            | <i>Chlorella sp.</i>                  | Mollusca     | Bivalve     | <i>Anodonta grandis</i>                 | <sup>14</sup> C             | Pardy, 1980                       |
|                                                            | <i>Chlorella sp.</i>                  | Porifera     | Sponge      | <i>Spongilla sp.</i>                    | <sup>14</sup> C             | Gilbert and Allen, 1973           |
|                                                            | <i>Elliptochloris marina</i> sp nov** | Cnidaria     | Anenome     | <i>Anthopleura xanthogrammica</i>       | <sup>14</sup> C             | O'Brien, 1980                     |
|                                                            | <i>Elliptochloris marina</i> sp nov** | Cnidaria     | Anenome     | <i>A. elegantissima</i>                 | O <sub>2</sub> Evol/CZAR*** | Verde and McCloskey, 1996         |
|                                                            | <i>Elliptochloris marina</i> sp nov** | Mollusca     | Nudibranch  | <i>Aeolidia papillosa</i>               | <sup>14</sup> C             | McFarland and Müller-Parker, 1993 |
|                                                            | <i>Symbiococcum hydrae</i>            | Cnidaria     | Hydra       | <i>Hydra magnipapillata</i>             |                             |                                   |
| <b><u>Prasinophyceae</u></b>                               |                                       |              |             |                                         |                             |                                   |
|                                                            | <i>Tetraselmis convolutae</i>         | Acoelomorpha | Flatworm    | <i>Symsagittifera roscoffensis</i>      | <sup>14</sup> C             | Muscatine et al., 1974            |
|                                                            | <i>Tetraselmis-like</i>               |              |             | <i>Convolutriloba retrogemma</i>        | Weight Difference           | Shannon et al., 2009              |
| <b><u>Bacillariophyceae</u></b>                            |                                       |              |             |                                         |                             |                                   |
|                                                            | <i>Licmophora</i>                     | Acoelomorpha | Flatworm    | <i>Convoluta convoluta</i>              |                             |                                   |
|                                                            | <i>Nitzschia sp.</i>                  | Porifera     | Sponge      | <i>Prianos melanos</i>                  |                             |                                   |

| SYMBIONT                                                                                                    |                                      | HOST         |             |                                  | Evidence of PS Activity  | Reference                                       |
|-------------------------------------------------------------------------------------------------------------|--------------------------------------|--------------|-------------|----------------------------------|--------------------------|-------------------------------------------------|
| Phylum/Class                                                                                                | Genus species/Clade                  | Phyla        | Organism    | Genus Species                    |                          |                                                 |
| <b><u>Dinophyceae</u></b>                                                                                   |                                      |              |             |                                  |                          |                                                 |
| <i>Eight clades of Symbiodinium are symbionts with marine invertebrates from at least 8 metazoan genera</i> |                                      |              |             |                                  |                          |                                                 |
|                                                                                                             | <i>Symbiodinium</i> sp. (Clades A-H) | Acoelomorpha | Flatworm    | <i>Waminoa</i> sp.               |                          |                                                 |
|                                                                                                             |                                      | Cnidaria     | Sea Anenome | <i>A. xanthogrammica</i>         | CZAR                     | Fitt et al., 1982                               |
|                                                                                                             |                                      | Cnidaria     | Sea Anenome | <i>Aiptasia pulchella</i>        | <sup>14</sup> C          | Clark and Jensen, 1982                          |
|                                                                                                             |                                      | Cnidaria     | Sea Anenome | <i>Anthopleura elegantissima</i> | <sup>14</sup> C          | Muscatine and Hand, 1958                        |
|                                                                                                             |                                      | Cnidaria     | Jellyfish   | <i>Cassiopea</i> sp.             | CZAR                     | Verde an McCloskey, 1998                        |
|                                                                                                             |                                      | Cnidaria     | Jellyfish   | <i>Mastigias</i> sp.             | CZAR                     | McCloskey et al., 1994                          |
|                                                                                                             |                                      | Cnidaria     | Corals      | <i>All species</i>               | <sup>14</sup> C          | Muscatine and Cernichiaro 1969; Muscatine, 1965 |
|                                                                                                             |                                      | Mollusca     | Nudibranch  | <i>Aeolidia papillosa</i>        | <sup>14</sup> C          | McFarland and Muller-Parker, 1993               |
|                                                                                                             |                                      | Mollusca     | Nudibranch  | <i>Dermatobranchus</i> sp.       | Fv/Fm                    | Wägele and Johnsen, 2001                        |
|                                                                                                             |                                      | Mollusca     | Nudibranch  | <i>Pteraeolidia ianthina</i>     | O <sub>2</sub> evolution | Hoeghuldberg and Hinde, 1986                    |
|                                                                                                             |                                      | Mollusca     | Nudibranch  | <i>Pteraeolidia ianthina</i>     | Fv/Fm                    | Yamamoto et al., 2009                           |
|                                                                                                             |                                      | Mollusca     | Bivalves    | <i>Tridacna gigas</i>            | <sup>14</sup> C          | Muscatine, 1967                                 |
|                                                                                                             |                                      | Porifera     | Sponge      | <i>Cliona cf. orientalis</i>     | Fv/Fm                    | Schonberg et al., 2008                          |
|                                                                                                             | <i>Amphidinium klebsii</i>           | Acoelomorpha | Flatworm    | <i>Amphiscolops langerhansi</i>  | <sup>14</sup> C          | Taylor, 1971                                    |
|                                                                                                             | <i>A. belauense</i>                  | Acoelomorpha | Flatworm    | <i>Haplodiscus</i> sp.           |                          | Trench and Winsor, 1987                         |
|                                                                                                             | <i>Scrippsiella velletae</i>         | Cnidaria     | Jellyfish   | <i>Veleva veleva</i>             |                          |                                                 |
|                                                                                                             | <i>S. chattonii</i>                  | Cnidaria     | Jellyfish   | <i>Veleva veleva</i>             |                          |                                                 |
|                                                                                                             | <i>Gymnodinium linucheae</i>         | Cnidaria     | Jellyfish   | <i>Linuche unguiculata</i>       |                          |                                                 |
|                                                                                                             | <i>Gloeodinium viscum</i>            | Cnidaria     | Hydra       | <i>Millepora dichotoma</i>       |                          |                                                 |
|                                                                                                             | <i>Prorocentrum concavum</i>         | Acoelomorpha | Flatworm    | <i>Amphiscolops</i> sp.          |                          |                                                 |

\*Initial surveys by Wilkinson (1979, 1980, 1983) on multiple sponge symbioses led to the acceptance of transfer of photosynthate from cyanobacteria to sponges.

\*\* Revised nomenclature for zoochlorella/chlorella based on Letsch et al., 2009.

\*\*\* Contribution of Zooxanthellae to Animal Respiration.
