# Supplementary material for: The making of a photosynthetic animal
Source: Oxford University Press journal article supplement (doi:10.1242/jeb.046540), 2010-12-22
Supplement: jeb046540tables2.pdf [file jeb046540tables2.pdf]

Table S2: Examples of sacoglossan molluscs, their algal prey, and their varied photosynthetic (PS) capabilities quantified by radioisotopic labeling ( $^{14}\text{C}$ ), fluorometry (Fv/Fm), spectrophotometry (Chla), or oxygen evolution ( $\text{O}_2$ ). Duration of chloroplast retention was based upon three categories outlined by Händeler et al. (2009): N = no functional chloroplasts, ST = 1 to 4 weeks of functional chloroplasts, LT (**bold**) = greater than 1 month functional chloroplasts. Underlined organisms are represented in Figure 2.

| Division of Algal Prey          | Superfamily      | Genus Species                  | PS measured             | Duration  | Reference               |
|---------------------------------|------------------|--------------------------------|-------------------------|-----------|-------------------------|
| Chlorophyta                     | Elysiodea        | <i>Bosellia mimetica</i>       | $^{14}\text{C}$         | ST        | Clark et al., 1990      |
|                                 |                  | <i>Bosellia mimetica</i>       | Fv/Fm                   | ST        | Händeler et al., 2009   |
|                                 |                  | <i>Bosellia sp.</i>            | Fv/Fm                   | ST        | Yamamoto et al., 2009   |
|                                 |                  | <b><i>Elysia australis</i></b> | $^{14}\text{C}$         | <b>LT</b> | Hinde, 1980             |
|                                 |                  | <i>Elysia bennettae</i>        | Fv/Fm                   | ST        | Händeler et al., 2009   |
|                                 |                  | <i>Elysia catulus</i>          | $^{14}\text{C}$         | N         | Clark et al., 1990      |
|                                 |                  | <i>Elysia cornigera</i>        | Fv/Fm                   | ST        | Händeler et al., 2009   |
|                                 |                  | <b><i>Elysia crispata</i></b>  | Chl <sup>a</sup>        | <b>LT</b> | Clark and Busacca, 1978 |
|                                 |                  | <b><i>Elysia crispata</i></b>  | Fv/Fm                   | <b>LT</b> | Händeler et al., 2009   |
|                                 |                  | <i>Elysia eveliae</i>          | $^{14}\text{C}$         | N         | Clark et al., 1990      |
|                                 |                  | <i>Elysia hedgpethi</i>        | $^{14}\text{C}$         | ST        | Green, 1970             |
|                                 |                  | <i>Elysia hedgpethi</i>        | Chl <sup>a</sup>        | ST        | Green, 1970             |
|                                 |                  | <i>Elysia ornata</i>           | Fv/Fm                   | ST        | Händeler et al., 2009   |
|                                 |                  | <i>Elysia ornata</i>           | Fv/Fm                   | LT        | Yamamoto et al., 2009   |
|                                 |                  | <i>Elysia pusilla</i>          | Fv/Fm                   | ST        | Händeler et al., 2009   |
|                                 |                  | <i>Elysia sp.</i>              | Fv/Fm                   | ST        | Evertsen et al., 2007   |
|                                 |                  | <i>Elysia subornata</i>        | Chl <sup>a</sup>        | ST        | Clark and Busacca, 1978 |
|                                 |                  | <i>Elysia subornata</i>        | Fv/Fm                   | N         | Händeler et al., 2009   |
|                                 |                  | <b><i>Elysia timida</i></b>    | $^{14}\text{C}$         | <b>LT</b> | Marin and Ros, 1993     |
|                                 |                  | <b><i>Elysia timida</i></b>    | Fv/Fm                   | <b>LT</b> | Händeler et al., 2009   |
|                                 |                  | <b><i>Elysia timida</i></b>    | Fv/Fm                   | <b>LT</b> | Evertsen et al., 2007   |
|                                 |                  | <i>Elysia tomentosa</i>        | Fv/Fm                   | ST        | Händeler et al., 2009   |
|                                 |                  | <i>Elysia tomentosa</i>        | Fv/Fm                   | ST        | Evertsen et al., 2007   |
| <b><i>Elysia trisinuata</i></b> | Fv/Fm            | <b>LT</b>                      | Yamamoto, 2009          |           |                         |
| <b><i>Elysia tuca</i></b>       | Chl <sup>a</sup> | <b>LT</b>                      | Clark and Busacca, 1978 |           |                         |

| Division of Algal Prey | Superfamily                       | Genus Species                         | PS measured                    | Duration        | Reference                   |                    |
|------------------------|-----------------------------------|---------------------------------------|--------------------------------|-----------------|-----------------------------|--------------------|
| Chlorophyta            | Elysiodea                         | <i>Elysia viridis</i>                 | <sup>14</sup> C                | LT              | Trench et al., 1973b        |                    |
|                        |                                   | <i>Elysia viridis</i>                 | <sup>14</sup> C                | LT              | Hinde and Smith, 1972, 1974 |                    |
|                        |                                   | <i>Elysia viridis</i>                 | Fv/Fm                          | LT              | Serôdio et al., 2009        |                    |
|                        |                                   | <i>Elysia viridis</i>                 | Fv/Fm                          | ST              | Händeler et al., 2009       |                    |
|                        |                                   | <i>Elysia viridis</i>                 | Fv/Fm                          | LT              | Evertsen and Johnson, 2009  |                    |
|                        |                                   | <i>Elysia zuleicae</i>                | Fv/Fm                          | N               | Händeler et al., 2009       |                    |
|                        |                                   | <i>Elysiella pusilla</i>              | Fv/Fm                          | ST              | Evertsen et al., 2007       |                    |
|                        |                                   | <b><i>Plakobranthus ocellatus</i></b> | Chl <sup>a</sup>               | LT              | Green, 1970                 |                    |
|                        |                                   | <b><i>Plakobranthus ocellatus</i></b> | Fv/Fm                          | LT              | Händeler et al., 2009       |                    |
|                        |                                   | <b><i>Plakobranthus ocellatus</i></b> | Fv/Fm                          | LT              | Evertsen et al., 2007       |                    |
|                        |                                   | <b><i>Plakobranthus ocellatus</i></b> | Fv/Fm                          | LT              | Yamamoto et al., 2009       |                    |
|                        |                                   | <i>Thuridilla carlsoni</i>            | Fv/Fm                          | ST              | Händeler et al., 2009       |                    |
|                        |                                   | <i>Thuridilla carlsoni</i>            | Fv/Fm                          | ST              | Evertsen et al., 2007       |                    |
|                        |                                   | <i>Thuridilla gracilis</i>            | Fv/Fm                          | ST              | Händeler et al., 2009       |                    |
|                        |                                   | <i>Thuridilla hopei</i>               | Fv/Fm                          | ST              | Händeler et al., 2009       |                    |
|                        |                                   | <i>Thuridilla kathae</i>              | Fv/Fm                          | ST              | Händeler et al., 2009       |                    |
|                        |                                   | <i>Thuridilla lineolata</i>           | Fv/Fm                          | ST              | Evertsen et al., 2007       |                    |
|                        |                                   | <i>Thuridilla vatae</i>               | Fv/Fm                          | ST              | Yamamoto et al., 2009       |                    |
|                        |                                   | Limapontioidea                        | <i>Alderia modesta</i>         | <sup>14</sup> C | ST                          | Clark et al., 1990 |
|                        |                                   |                                       | <i>Caliphylla mediterranea</i> | <sup>14</sup> C | ST                          | Clark et al., 1990 |
|                        | <i>Costasiella antillensis</i>    |                                       | Fv/Fm                          | N               | Händeler et al., 2009       |                    |
|                        | <i>Costasiella cf. kuroshimae</i> |                                       | Fv/Fm                          | N               | Händeler et al., 2009       |                    |
|                        | <i>Costasiella liliana</i>        |                                       | <sup>14</sup> C                | LT              | Clark et al., 1981          |                    |
|                        | <i>Costasiella nonatoi</i>        |                                       | Fv/Fm                          | N               | Händeler et al., 2009       |                    |
|                        | <i>Costasiella roshimae</i>       |                                       | Fv/Fm                          | ST              | Yamamoto et al., 2009       |                    |
|                        | <i>Cyerce antillensis</i>         |                                       | Fv/Fm                          | N               | Händeler et al., 2009       |                    |
|                        | <i>Cyerce nigricans</i>           |                                       | Fv/Fm                          | N               | Händeler et al., 2009       |                    |
|                        | <i>Ercolania coerulea</i>         |                                       | <sup>14</sup> C                | N               | Clark et al., 1990          |                    |
|                        | <i>Ercolania kencolesi</i>        |                                       | Fv/Fm                          | N               | Händeler et al., 2009       |                    |
|                        | <i>Hermaea cruciata</i>           |                                       | <sup>14</sup> C                | ST              | Clark et al., 1990          |                    |

| Division of Algal Prey | Superfamily    | Genus Species                    | PS measured      | Duration | Reference                   |
|------------------------|----------------|----------------------------------|------------------|----------|-----------------------------|
| Chlorophyta            | Limapontioidea | <i>Limapontia depressa</i>       | <sup>14</sup> C  |          | Hinde and Smith, 1974       |
|                        |                | <i>Mourgona germainea</i>        | <sup>14</sup> C  | ST       | Clark et al., 1990          |
|                        |                | <i>Placida dendritica</i>        | Fv/Fm            | N        | Händeler et al., 2009       |
|                        |                | <i>Placida dendritica</i>        | Fv/Fm            | N        | Evertsen and Johnsen, 2009  |
|                        |                | <i>Placida</i> sp                | Fv/Fm            | ST       | Yamamoto et al., 2009       |
|                        |                | <i>Polybranchia orientalis</i>   | Fv/Fm            | N        | Händeler et al., 2009       |
|                        |                | <i>Stiliger ornatus</i>          | Fv/Fm            | ST       | Yamamoto et al., 2009       |
|                        | Oxynooidea     | <i>Ascobulla ulla</i>            | Chl <sup>a</sup> | N        | Clark et al., 1990          |
|                        |                | <i>Julia exquisita</i>           | Fv/Fm            | N        | Händeler et al., 2009       |
|                        |                | <i>Julia zebra</i>               | Fv/Fm            | N        | Händeler et al., 2009       |
|                        |                | <i>Julia zebra</i>               | Fv/Fm            | ST       | Yamamoto et al., 2009       |
|                        |                | <i>Lobiger viridis</i>           | Fv/Fm            | N        | Händeler et al., 2009       |
|                        |                | <b><i>Oxynoe antillarum</i></b>  | Chl <sup>a</sup> | LT       | Clark and Busacca, 1978     |
|                        |                | <i>Oxynoe antillarum</i>         | Fv/Fm            | N        | Händeler et al., 2009       |
|                        |                | <i>Oxynoe</i> cf. <i>viridis</i> | Fv/Fm            | N        | Händeler et al., 2009       |
| Heterokontophyta       | Elysiodea      | <b><i>Elysia chlorotica</i></b>  | O <sub>2</sub>   | LT       | Rumpho et al., 2000         |
| Rhodophyta             | Elysiodea      | <b><i>Elysia viridis</i></b>     | <sup>14</sup> C  | LT       | Trench et al., 1973b        |
|                        | Elysiodea      | <b><i>Elysia viridis</i></b>     | <sup>14</sup> C  | LT       | Hinde and Smith, 1972, 1974 |
|                        | Elysiodea      | <b><i>Elysia viridis</i></b>     | Fv/Fm            | LT       | Serôdio et al., 2009        |
|                        | Elysiodea      | <i>Elysia viridis</i>            | Fv/Fm            | ST       | Händeler et al., 2009       |
|                        | Elysiodea      | <b><i>Elysia viridis</i></b>     | Fv/Fm            | LT       | Evertsen and Johnson, 2009  |
|                        | Limapontioidea | <i>Hermaea cruciata</i>          | <sup>14</sup> C  | ST       | Clark et al., 1990          |
